CORRECTION

## Correction: ToxoNet: A high confidence map of protein-protein interactions in *Toxoplasma gondii*

Lakshmipuram S. Swapna, Grant C. Stevens, Aline Sardinha-Silva, Lucas ZhongMing Hu, Verena Brand, Daniel D. Fusca, Cuihong Wan, Xuejian Xiong, Jon P. Boyle, Michael E. Grigg, Andrew Emili, John Parkinson

The fourth author's name is spelled incorrectly. The correct name is: Lucas ZhongMing Hu. The correct citation is: Swapna LS, Stevens GC, Sardinha-Silva A, Hu LZ, Brand V, Fusca DD, et al. (2024) ToxoNet: A high confidence map of protein-protein interactions in *Toxoplasma gondii*. PLoS Comput Biol 20(6): e1012208. <https://doi.org/10.1371/journal.pcbi.1012208>

### Reference

1. Swapna LS, Stevens GC, Sardinha-Silva A, Hu LZ, Brand V, Fusca DD, et al. ToxoNet: A high confidence map of protein-protein interactions in *Toxoplasma gondii*. PLoS Comput Biol. 2024;20(6):e1012208. <https://doi.org/10.1371/journal.pcbi.1012208> PMID: [38900844](https://pubmed.ncbi.nlm.nih.gov/38900844/)

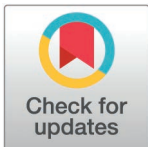

### OPEN ACCESS

**Citation:** Swapna LS, Stevens GC, Sardinha-Silva A, Hu LZ, Brand V, Fusca DD, et al. (2026) Correction: ToxoNet: A high confidence map of protein-protein interactions in *Toxoplasma gondii*. PLoS Comput Biol 22(3): e1014086. <https://doi.org/10.1371/journal.pcbi.1014086>

**Published:** March 13, 2026

**Copyright:** © 2026 Swapna et al. This is an open access article distributed under the terms of the [Creative Commons Attribution License](https://creativecommons.org/licenses/by/4.0/), which permits unrestricted use, distribution, and reproduction in any medium, provided the original author and source are credited.
